# Supplementary material for: Qualitative inquiry into barriers and facilitators to transforming primary care for lesbian, gay, bisexual and transgender people in US federally qualified health centres
Source: HighWire-hosted journal article supplement (doi:10.1136/bmjopen-2021-055884), 2022-02-01
Supplement: bmjopen-2021-055884supp001_data_supplement.pdf [file bmjopen-2021-055884supp001_data_supplement.pdf]

**APPENDICES****Appendix 1: Coding Schema for Clinical Topics**

| <b>Code</b>                             | <b>Files</b> | <b>References</b> |
|-----------------------------------------|--------------|-------------------|
| Behavioral Health                       | 62           | 341               |
| PrEP                                    | 25           | 229               |
| Hormone Therapy                         | 28           | 141               |
| Sexual Orientation Gender Identity Data | 29           | 108               |
| HIV/AIDS                                | 35           | 104               |
| Gender-Affirming Treatment              | 30           | 94                |
| Risk Based Sexual History               | 33           | 58                |
| Extragenital STD Screening              | 26           | 56                |
| Specialty                               | 27           | 44                |
| Substance abuse                         | 19           | 38                |
| Transgender Male To Female              | 19           | 27                |
| Gay                                     | 19           | 26                |
| Transgender Female To Male              | 16           | 22                |
| Abuse                                   | 15           | 22                |
| Discrimination or Stigmatization        | 12           | 20                |
| PEP                                     | 2            | 19                |
| Transgender (gender not specified)      | 11           | 17                |
| Syphilis Testing                        | 5            | 15                |
| Chlamydia/ Gonorrhea Testing            | 8            | 15                |
| Immigration Status                      | 5            | 14                |
| Bisexual                                | 9            | 11                |
| Breast cancer screening                 | 2            | 11                |
| Lesbian                                 | 5            | 10                |
| Legal Background                        | 5            | 6                 |
| Heterosexual                            | 5            | 5                 |
| School Based Health                     | 4            | 5                 |
| Dental                                  | 3            | 4                 |
| Women's Health                          | 2            | 3                 |

|               |   |   |
|---------------|---|---|
| Endocrinology | 0 | 0 |
|---------------|---|---|

## Appendix 2: Coding Schema for Health System and Cultural Topics

| Code                                     | Files | References |
|------------------------------------------|-------|------------|
| <b>Health Information Technology</b>     | 28    | 128        |
| Negative                                 | 21    | 35         |
| Positive                                 | 7     | 12         |
| <b>Staff Training</b>                    | 26    | 119        |
| Positive                                 | 11    | 19         |
| Negative                                 | 4     | 4          |
| <b>Workflow Change</b>                   | 27    | 111        |
| Positive                                 | 11    | 21         |
| Negative                                 | 3     | 4          |
| <b>Change Acceptance</b>                 | 25    | 75         |
| Positive                                 | 9     | 10         |
| Negative                                 | 7     | 8          |
| <b>Patient Engagement</b>                | 18    | 68         |
| Positive                                 | 8     | 8          |
| Negative                                 | 4     | 5          |
| <b>Implementation Team</b>               | 15    | 66         |
| Positive                                 | 9     | 11         |
| Negative                                 | 8     | 9          |
| <b>Project ECHO</b>                      | 15    | 61         |
| Positive                                 | 8     | 10         |
| Negative                                 | 3     | 3          |
| <b>Policy</b>                            | 19    | 59         |
| Positive                                 | 9     | 14         |
| Negative                                 | 3     | 4          |
| <b>Time</b>                              | 15    | 59         |
| Negative                                 | 9     | 18         |
| Positive                                 | 0     | 0          |
| <b>Community Engagement and Partners</b> | 35    | 101        |
| Positive                                 | 15    | 18         |
| Negative                                 | 2     | 2          |
| <b>Leadership Support</b>                | 17    | 45         |
| Positive                                 | 11    | 18         |
| Negative                                 | 3     | 5          |
| <b>Culture</b>                           | 21    | 44         |
| Negative                                 | 6     | 6          |
| Positive                                 | 3     | 3          |
| <b>Expansion of LGBT Services</b>        | 12    | 28         |
| Positive                                 | 6     | 8          |

|                                   |    |    |
|-----------------------------------|----|----|
| Negative                          | 2  | 3  |
| <b>Provider Engagement</b>        | 13 | 28 |
| Positive                          | 4  | 4  |
| Negative                          | 2  | 2  |
| <b>Organizational Description</b> | 12 | 26 |
| Positive                          | 2  | 3  |
| Negative                          | 1  | 2  |
| <b>Sustainability</b>             | 14 | 24 |
| Positive                          | 7  | 8  |
| Negative                          | 1  | 1  |
| <b>Support Staff Role</b>         | 10 | 24 |
| Positive                          | 2  | 5  |
| Negative                          | 3  | 3  |
| <b>Online Learning Platform</b>   | 6  | 21 |
| Negative                          | 4  | 5  |
| Positive                          | 3  | 4  |
| <b>Additional Funding</b>         | 8  | 18 |
| Positive                          | 6  | 11 |
| Negative                          | 2  | 2  |
| <b>Resources Provided</b>         | 6  | 10 |
| Positive                          | 3  | 3  |
| Negative                          | 0  | 0  |
| <b>Organizational Goals</b>       | 4  | 6  |
| Positive                          | 1  | 1  |
| Negative                          | 1  | 1  |
